# Supplementary material
Source: publisher figshare collection journal article supplement (https://aacr.figshare.com/articles/dataset/_/22488873)
Supplement: Supplementary file 1 [file 39940491]

## Supplementary Figure 3

A

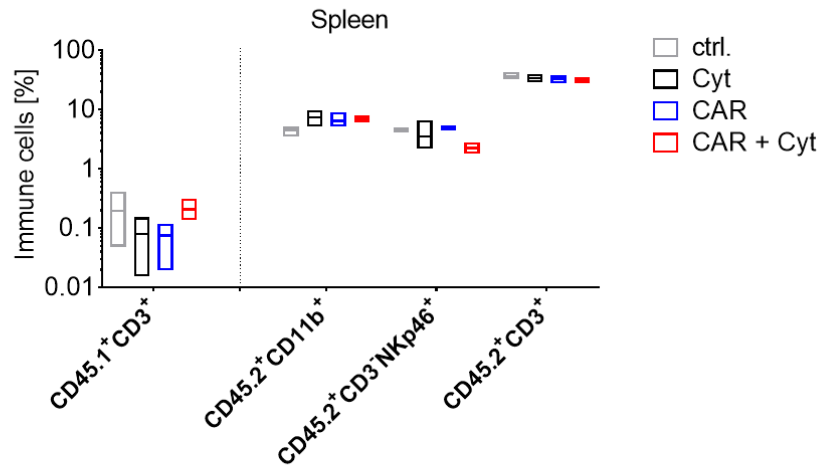

B

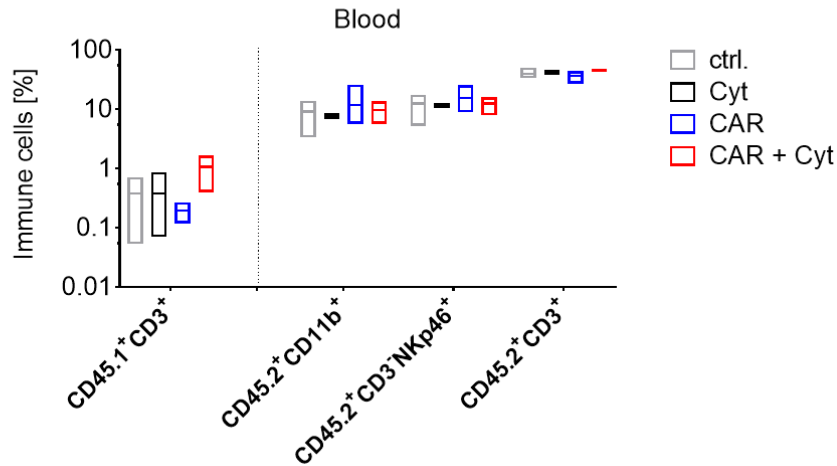

73

74 **Supplementary Figure 3. *Ex vivo* flow cytometry analysis of spleen- and blood-derived**  
 75 **immune cells upon intratumoral treatment of glioma-bearing mice with different modified**  
 76 **T cells**

77 **A.** GL-261 glioma-bearing mice were treated intratumorally at days 7 and 12 after tumor  
 78 implantation with  $2 \times 10^6$  murine T cells that were either mock-electroporated (ctrl.) or transfected  
 79 with mRNAs encoding for mIL12 and mIFN $\alpha$ 2 (Cyt), or the NKG2D CAR (CAR), or all three  
 80 transgenes (CAR + Cyt). Spleens were isolated at day 14 after tumor implantation and analyzed  
 81 by flow cytometry. **B.** Same setup as in A, but blood was analyzed. Mean  $\pm$  SD are shown
